# Supplementary material
Source: PubMed Central journal article supplement (PMC533045)
Supplement: 7600458s7.pdf [file 7600458s7.pdf]

## Structural states of myosin motors characterized at high resolution.

| Myosin                                                           | PDB code         | Laboratory (ref) | 50 kDa cleft | Lever-arm | $\beta$ -sheet | sw I                | sw II                 | P-loop                             | SH1-helix/Relay           |
|------------------------------------------------------------------|------------------|------------------|--------------|-----------|----------------|---------------------|-----------------------|------------------------------------|---------------------------|
| <b><u>Post-rigor / Near-rigor / open state:</u></b>              |                  |                  |              |           |                |                     |                       |                                    |                           |
| Ck Myosin II                                                     | 2MYS             | Rayment (1)      | OPEN         | DOWN      | untwisted      | near nucleotide     | "Open", free          | Conventional MgATP, MgADP          | few interactions          |
| Dd Myosin II                                                     | 1MMD, 1FMW       | Rayment (2, 3)   |              |           |                |                     |                       |                                    |                           |
| Sc Myosin II                                                     | 1SR6, 1S5G       | Cohen (4)        |              |           |                |                     |                       |                                    |                           |
| Myosin V                                                         | 1W7J             | Houdusse (5)     |              |           |                |                     |                       |                                    |                           |
| <b><u>Pre-powerstroke / transition-state / closed state:</u></b> |                  |                  |              |           |                |                     |                       |                                    |                           |
| Dd Myosin II                                                     | 1VOM             | Rayment (6)      | Partially    | UP        | untwisted      | near nucleotide     | near $\gamma$ -Pi     | Conventional MgADP.Pi              | Strong interactions       |
| Sm Myosin II                                                     | 1BR1, 1BR2       | Cohen (7)        | CLOSED       |           |                |                     | "Closed"              |                                    | SH1 helix far from Sw II  |
| Sc Myosin II                                                     | 1QVI             | Cohen (8)        |              |           |                |                     |                       |                                    |                           |
| Dd Myosin I myoE                                                 | 1LKX             | Kull (9)         |              |           |                |                     |                       |                                    |                           |
| <b><u>Rigor-like state:</u></b>                                  |                  |                  |              |           |                |                     |                       |                                    |                           |
| N.F. Myosin V                                                    | 1OE9             | Houdusse (10)    | Fully        | DOWN      | Twisted        | far from nucleotide | near N-term subdomain | Obstructed (not ATP, not ADP) none | Strong interactions       |
|                                                                  | 1W8J             | Houdusse (5)     | CLOSED       |           |                |                     |                       |                                    | SH1 helix close to Sw II  |
| <b><u>ADP-weak:</u></b>                                          |                  |                  |              |           |                |                     |                       |                                    |                           |
| M5 +soaked ADP                                                   | 1W7I             | Houdusse (5)     | Fully        | DOWN      | Twisted        | far from nucleotide | near N-term free      | Intermediate (not ATP) ADP bound   | Strong interactions       |
|                                                                  |                  |                  | CLOSED       |           |                |                     |                       |                                    | SH1 helix close to Sw II  |
| <b><u>Detached:</u></b>                                          |                  |                  |              |           |                |                     |                       |                                    |                           |
| Sc Myosin II                                                     | 1B7T, 1KWO, 1KK8 | Cohen (11,12)    | OPEN         | Uncoupled | untwisted      | near nucleotide     | "Open", Free          | Conventional MgATP, MgADP          | SH1 helix unwound         |
| <b><u>Nucleotide-free myosin:</u></b>                            |                  |                  |              |           |                |                     |                       |                                    |                           |
| Dd Myosin II                                                     | 1Q5G             | Manstein (13)    | Partially    | DOWN      | Twisted        | far from nucleotide | near Sw I             | Conventional none                  | Strong interactions       |
|                                                                  |                  |                  | CLOSED       |           |                |                     |                       |                                    | SH1 helix closer to Sw II |

## **References:**

- 1- Rayment, I., et al. (1993a) *Science* **261**, 50-8.
- 2- Fisher. A.J. et al. (1995) *Biochemistry* **34**, 8960-8972. – Gulick A.M. et al. (1997) *Biochemistry* **36**, 11619-28.
- 3- Bauer, C.B. et al. (2000) *J. Biol.Chem.* **275**, 38494-9.
- 4- Risal, D. et al. (2004) *P.N.A.S. USA* **101**, 8930-5. (Houdusse et al. (1999) *P.N.A.S. USA* **97**, 11238-43).
- 5- Coureux et al. (2004) – This study.
- 6- Smith, C.A. and Rayment, I. (1996) *Biochemistry* **35**, 5404-5417.
- 7- Dominguez et al. (1998) *Cell* **94**, 559-71.
- 8- Gourinath, S. et al. (2003) *Structure* **11**, 1621-7. (Houdusse et al. (1999) *P.N.A.S. USA* **97**, 11238-43)
- 9- Kollmar, M et al. (2002) *EMBO J.* **21**, 2517-25.
- 10- Coureux, P-D. et al. (2003) *Nature* . **425**, 419-23.
- 11- Houdusse A. et al. (1999) *Cell* **97**, 459-70.
- 12- Himmel, D.M. et al. (2002) *P.N.A.S. USA* **99**, 12545-50.
- 13- Reubold T.F. et al. (2003) *Nat Struct Biol.* **10**, 826-30.
