# Supplementary material
Source: PubMed Central journal article supplement (PMC533045)
Supplement: 7600458s8.pdf [file 7600458s8.pdf]

## Sequence of key structural elements of the myosin Motor.

Conserved residues are in red.

|                             |            | Chicken Myosin V                                          | Dd. Myosin II                                     |
|-----------------------------|------------|-----------------------------------------------------------|---------------------------------------------------|
| P-loop                      |            | 162- <b>GESGAGKT</b> -170                                 | 178- <b>TGESGAGKT</b> -186                        |
| Loop1                       | TRANSDUCER | 184-SGSASEAN-191 <b>(8)</b>                               | 200-AGRNQANGSGV-V210 <b>(11)</b>                  |
| HG helix                    | TRANSDUCER | 192-VEEKVLA-198                                           | 211-LEQQILQ-217                                   |
| Switch I                    |            | 209- <b>AKTTRNDSSR</b> -219                               | 228- <b>AKTTRNNSSR</b> -238                       |
| $\beta$ 6, bulge, $\beta$ 7 | TRANSDUCER | 220- <b>FGKYIEIG</b> FDKRYR <b>IIGAN</b> MR <b>T</b> -241 | 239- <b>FGKFIIEIQ</b> FNNAG <b>FISGASIQS</b> -260 |
| Linker                      | TRANSDUCER | 423- <b>LHSTVKQHS</b> -431 <b>(9)</b>                     | 441- <b>LCQERKAY</b> -448 <b>(8)</b>              |
| $\beta$ 5                   | TRANSDUCER | 432- <b>FIGVLD</b> -437                                   | 449- <b>FIGVLD</b> -454                           |
| Switch II                   |            | 437- <b>DIYGFETFEINS</b> -448                             | 454- <b>DISGFEIFKVNS</b> -465                     |
| Relay                       |            | 467- <b>MHVFKLEQEEYMKEQIPWTLIDF</b> -Y <b>DNQ</b> -493    | 484- <b>HMHFKLEQEEYLKEKINWTFIDFGLDSQ</b> -511     |
| Strut                       |            | 569- <b>KD</b> TVYE-574                                   | 589- <b>KD</b> PLQQ-594                           |
| SH2, <u>SH1 helix</u>       |            | 684-AC <b>GVLETIRI</b> SAAG-697                           | 678-CN <b>GVLEGIRI</b> TRKG-691                   |
